# Supplementary material for: Ligand density and clustering effects on endocytosis of folate modified nanoparticles
Source: Royal Society of Chemistry journal article supplement (doi:10.1039/c2ra01168a), 2012-01-01
Supplement: c2ra01168a.pdf [file c2ra01168a.pdf]

### Supplementary information

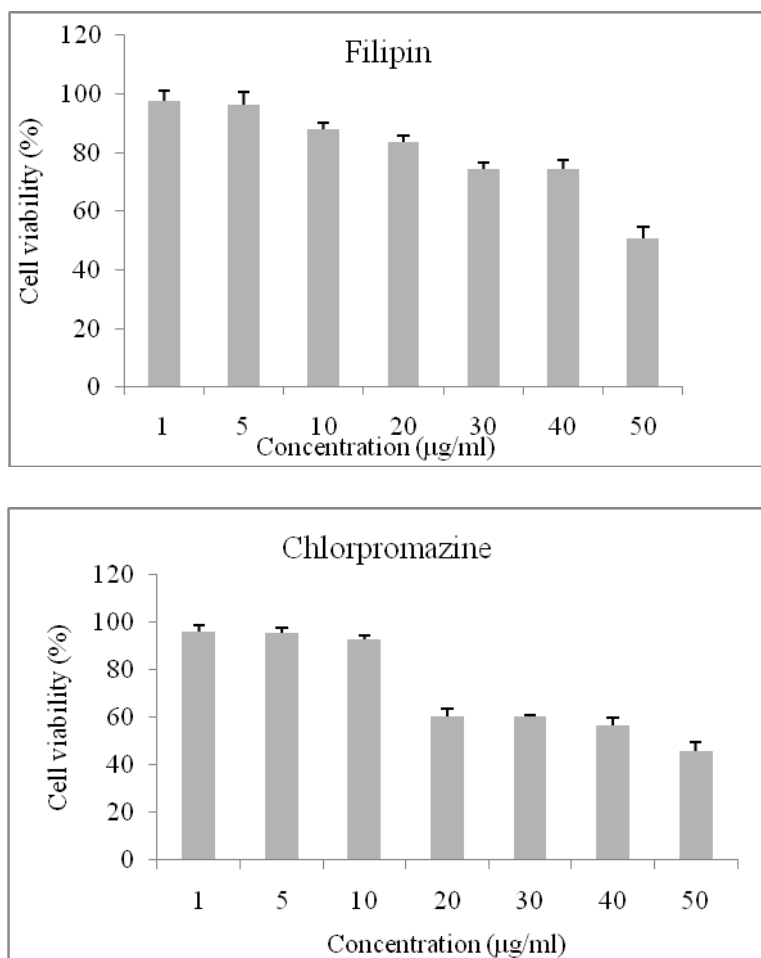

**Fig. S1.** Effect of filipin and chlorpromazine on Calu-3 cell metabolic activity, as determined by the MTS assay. Cell viability (%) was calculated relative to HBSS and Triton X-100 (0.1% v/v in HBSS) as the negative and positive controls, respectively. Data expressed as relative cell metabolic activity and presented as the mean  $\pm$  SD (n=4).
